# Supplementary material
Source: publisher site journal article supplement (https://neobiota.pensoft.net/article/82636/download/suppl/35/)
Supplement: Supplementary file 1

# **Plankton hitch-hikers on naturalist's instruments as silent intruders of aquatic ecosystems: current risks and possible prevention**

Łukasz Wejnerowski <sup>1</sup>, Tümer Orhun Aykut <sup>2</sup>, Aleksandra Pełechata <sup>1</sup>, Michał Rybak <sup>3</sup>, Tamara Dulić <sup>4</sup>, Jussi Meriluoto <sup>4</sup>, Marcin Krzysztof Dziuba <sup>5</sup>

<sup>1</sup> *Department of Hydrobiology, Institute of Environmental Biology, Faculty of Biology, Adam Mickiewicz University, Poznań, Poland* <sup>2</sup> *Department of Biology, Institute of Science, Istanbul University, Istanbul, Turkey* <sup>3</sup> *Department of Water Protection, Institute of Environmental Biology, Faculty of Biology, Adam Mickiewicz University, Poznań, Poland* <sup>4</sup> *Biochemistry, Faculty of Science and Engineering, Åbo Akademi University, Turku, Finland* <sup>5</sup> *Department of Ecology and Evolutionary Biology, University of Michigan, Ann Arbor, USA*

Corresponding author: Łukasz Wejnerowski ([wejner@amu.edu.pl](mailto:wejner@amu.edu.pl))

## **Supplementary Material 5**

**Top view of the content of two randomly selected beakers of Biosecurity(-) treatment after seven days of incubation in a phytotron**

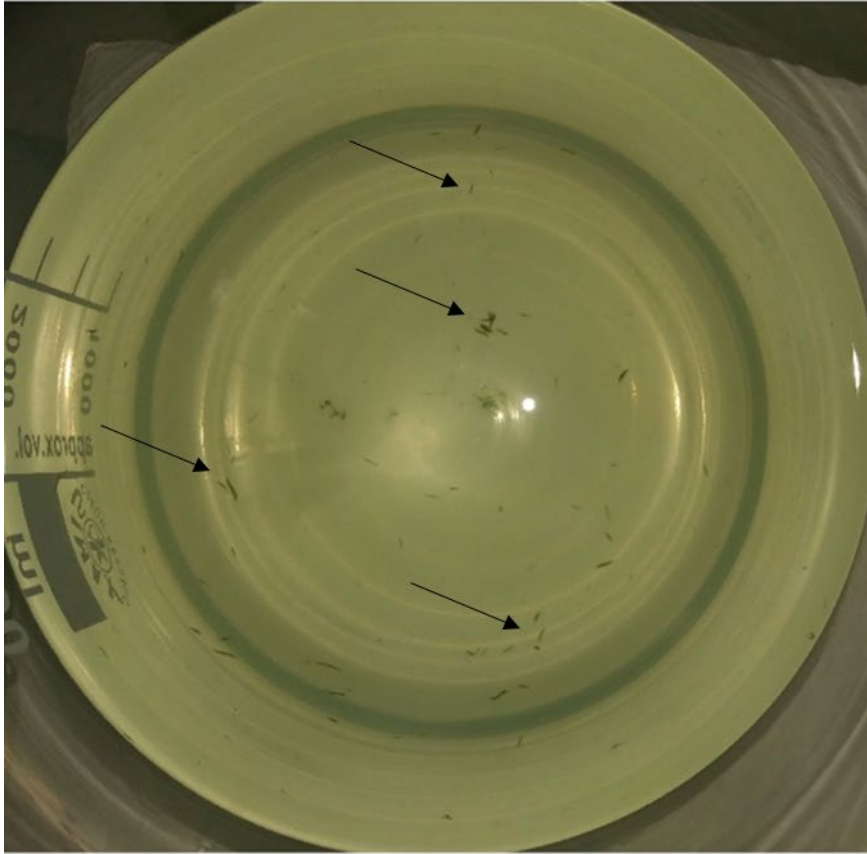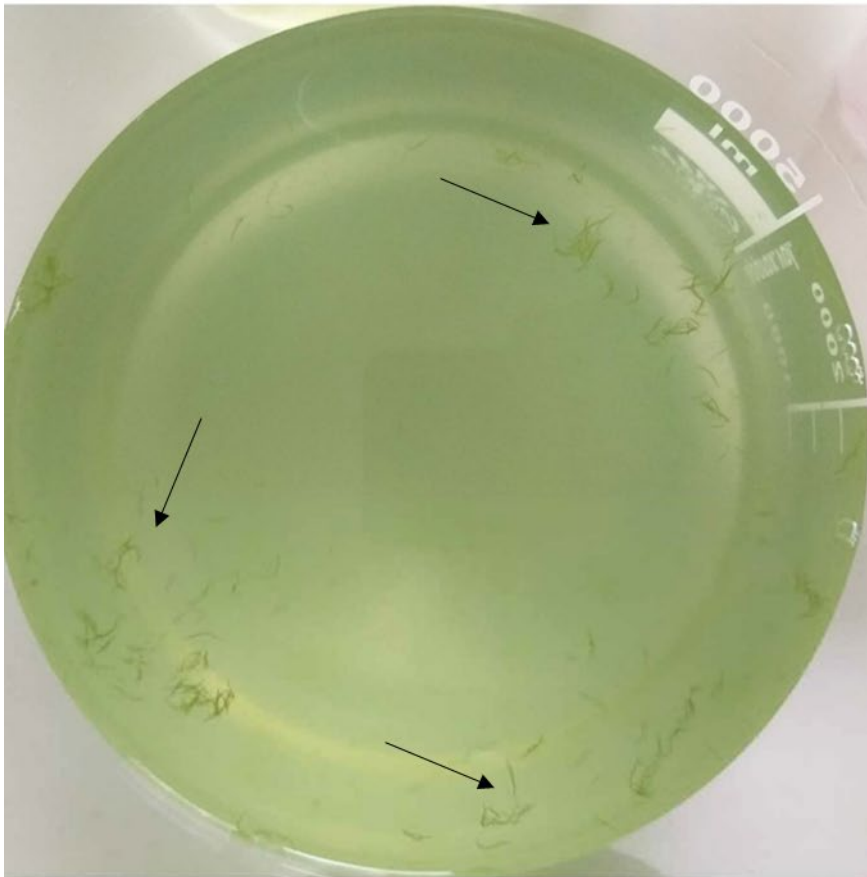

\* Black arrows indicate exemplary fascicles of *A. flos-aquae*
